# Supplementary material for: CO2 adsorption in natural deep eutectic solvents: insights from quantum mechanics and molecular dynamics
Source: Royal Society of Chemistry journal article supplement (doi:10.1039/d4cp03865g), 2025-01-01
Supplement: d4cp03865g1.pdf [file d4cp03865g1.pdf]

# Electronic Supporting Information

## CO<sub>2</sub> Adsorption in Natural Deep Eutectic Solvents: Insights from Quantum Mechanics and Molecular Dynamics

Chengxu Zhu,<sup>ab</sup> Hannah Wood,<sup>c</sup> Paola Carbone,<sup>c</sup> Carmine D'Agostino<sup>\*bd</sup> and Sam P. de Visser<sup>\*ab</sup>

---

<sup>a</sup> *Manchester Institute of Biotechnology, The University of Manchester, 131 Princess Street, Manchester M1 7DN, United Kingdom.*

<sup>b</sup> *Department of Chemical Engineering, The University of Manchester, Oxford Road, Manchester M13 9PL, United Kingdom.*

<sup>c</sup> *Department of Chemistry, The University of Manchester, Oxford Road, Manchester M13 9PL, United Kingdom.*

<sup>d</sup> *Dipartimento di Ingegneria Civile, Chimica, Ambientale e dei Materiali (DICAM), Alma Mater Studiorum – Università di Bologna, Via Terracini, 28, 40131 Bologna, Italy.*

**Table S1.** Calculated density and experimental density of different systems

(1A3G means the molar ratio of arginine to glycerol is 1 : 3)

|                                        | 1A3G  | 1A4G  | 1A5G  | 1A6G  | 1A7G  | 1A8G  | 1A9G  |
|----------------------------------------|-------|-------|-------|-------|-------|-------|-------|
| Computation density g/cm <sup>3</sup>  | 1.313 | 1.309 | 1.304 | 1.307 | 1.307 | 1.306 | 1.302 |
| Experimental density g/cm <sup>3</sup> | 1.213 | 1.220 | 1.225 | 1.229 | 1.231 | 1.233 | 1.235 |
| Deviation %                            | 7.62  | 6.80  | 6.06  | 5.97  | 5.81  | 5.59  | 5.15  |

**Table S2.** General Amber force field parameters

| Atom type | Mass     | Ptype | Sigma (nm) | Epsilon (kJ/mol) |
|-----------|----------|-------|------------|------------------|
| n3        | 14.01000 | A     | 0.325000   | 0.711280         |
| hn        | 1.00800  | A     | 0.106908   | 0.0656888        |
| c3        | 12.01000 | A     | 0.339967   | 0.457730         |
| h1        | 1.00800  | A     | 0.247135   | 0.0656888        |
| c         | 12.01000 | A     | 0.339967   | 0.359824         |
| hc        | 1.00800  | A     | 0.264953   | 0.0656888        |
| o         | 16.00000 | A     | 0.295992   | 0.878640         |
| nh        | 14.01000 | A     | 0.325000   | 0.711280         |
| c2        | 12.01000 | A     | 0.339967   | 0.359824         |
| n2        | 14.01000 | A     | 0.325000   | 0.711280         |
| oh        | 16.00000 | A     | 0.306647   | 0.880314         |
| ho        | 1.00800  | A     | 0.000000   | 0.000000         |
| c1        | 12.01000 | A     | 0.339967   | 0.878640         |

**Table S3.** Parameters for arginine

| Atom number | Atom type | Atom name | Coordination |        |        | Charge        |
|-------------|-----------|-----------|--------------|--------|--------|---------------|
|             |           |           | X            | Y      | Z      |               |
| 1           | n3        | N1        | 3.630        | -1.410 | -0.380 | -1.1133494944 |
| 2           | hn        | H1        | 3.660        | -1.710 | 0.580  | 0.3932784391  |
| 3           | c3        | C1        | 2.520        | -0.480 | -0.590 | 0.4551817702  |
| 4           | h1        | H2        | 2.480        | -0.240 | -1.650 | 0.0286247581  |
| 5           | c3        | C2        | 1.150        | -1.000 | -0.130 | -0.3333598985 |
| 6           | c         | C3        | 2.850        | 0.830  | 0.110  | 0.6690911117  |
| 7           | hc        | H3        | 0.980        | -1.940 | -0.680 | 0.0671924813  |
| 8           | hc        | H4        | 1.210        | -1.260 | 0.930  | 0.0671924813  |
| 9           | c3        | C4        | -0.000       | -0.040 | -0.390 | 0.0316707860  |
| 10          | o         | O1        | 2.840        | 1.920  | -0.410 | -0.6400469357 |
| 11          | hc        | H5        | 0.140        | 0.890  | 0.180  | -0.0062928291 |
| 12          | hc        | H6        | -0.020       | 0.240  | -1.440 | -0.0062928291 |
| 13          | c3        | C5        | -1.340       | -0.640 | 0.010  | 0.5218318787  |
| 14          | h1        | H7        | -1.510       | -1.580 | -0.540 | -0.0456828649 |
| 15          | h1        | H8        | -1.350       | -0.890 | 1.070  | -0.0456828649 |
| 16          | nh        | N2        | -2.420       | 0.300  | -0.240 | -0.8749807825 |
| 17          | hn        | H9        | -2.330       | 0.840  | -1.090 | 0.3995906341  |
| 18          | c2        | C6        | -3.710       | 0.030  | 0.140  | 0.9443111678  |
| 19          | n2        | N3        | -3.980       | -0.990 | 0.890  | -1.0460754223 |
| 20          | nh        | N4        | -4.640       | 0.920  | -0.390 | -0.9445568904 |
| 21          | hn        | H10       | -4.960       | -0.990 | 1.140  | 0.3876142426  |
| 22          | hn        | H11       | -4.310       | 1.850  | -0.550 | 0.3822916574  |
| 23          | hn        | H12       | -5.540       | 0.900  | 0.070  | 0.3868449243  |
| 24          | hn        | H13       | 3.480        | -2.240 | -0.950 | 0.4302925983  |
| 25          | oh        | O2        | 3.130        | 0.650  | 1.410  | -0.5581123186 |
| 26          | ho        | H14       | 3.330        | 1.520  | 1.810  | 0.4494241993  |

**Table S4.** Parameters for glycerol

| Atom number | Atom type | Atom name | Coordination |        |        | Charge        |
|-------------|-----------|-----------|--------------|--------|--------|---------------|
|             |           |           | X            | Y      | Z      |               |
| 1           | c3        | C1        | 1.300        | -0.520 | 0.340  | 0.1455517688  |
| 2           | h1        | H1        | 1.310        | -1.600 | 0.150  | 0.0222339830  |
| 3           | h1        | H2        | 1.320        | -0.350 | 1.420  | 0.0222339830  |
| 4           | c3        | C2        | 0.030        | 0.070  | -0.230 | 0.3518624679  |
| 5           | h1        | H3        | 0.100        | 0.050  | -1.330 | 0.0327516223  |
| 6           | c3        | C3        | -1.190       | -0.740 | 0.190  | 0.0686377814  |
| 7           | h1        | H4        | -1.250       | -0.790 | 1.280  | 0.0385488174  |
| 8           | h1        | H5        | -1.130       | -1.750 | -0.210 | 0.0385488174  |
| 9           | oh        | O1        | -0.100       | 1.420  | 0.210  | -0.6625236346 |
| 10          | ho        | H6        | -1.020       | 1.670  | 0.030  | 0.4027883631  |
| 11          | oh        | O2        | -2.340       | -0.060 | -0.340 | -0.6801729420 |
| 12          | ho        | H7        | -3.120       | -0.340 | 0.150  | 0.4609645072  |
| 13          | oh        | O3        | 2.420        | 0.110  | -0.290 | -0.6930086286 |
| 14          | ho        | H8        | 3.220        | -0.250 | 0.110  | 0.4515830937  |

**Table S5.** Parameters for CO<sub>2</sub>

| Atom number | Atom type | Atom name | Coordination |       |        | Charge        |
|-------------|-----------|-----------|--------------|-------|--------|---------------|
|             |           |           | X            | Y     | Z      |               |
| 1           | o         | O1        | -1.950       | 0.530 | -0.000 | -0.3933990076 |
| 2           | c1        | C1        | -0.800       | 0.530 | 0.000  | 0.7866953474  |
| 3           | o         | O2        | 0.360        | 0.530 | -0.000 | -0.3932963398 |

**Table S6.** Details of hydrogen bonds with occupancy > 80%.

(Residue ID 1 is arginine, Residue ID 2-201 are glycerol.)

| Number | Atom ID |      | Atom Name |    | Residue ID |     |
|--------|---------|------|-----------|----|------------|-----|
|        | D       | A    | D         | A  | D          | A   |
| 0.987  | 1506    | 0    | O2        | N1 | 107        | 1   |
| 0.968  | 2586    | 18   | O3        | N3 | 184        | 1   |
| 0.960  | 1394    | 18   | O2        | N3 | 99         | 1   |
| 0.817  | 0       | 2540 | N1        | O1 | 1          | 181 |
| 0.791  | 0       | 2794 | N1        | O2 | 1          | 199 |
| 0.768  | 15      | 2582 | N2        | O1 | 1          | 184 |

**Table S7.** Hydrogen bonds in 1A200G box.

| Type | Doner       | Acceptor    | Occupancy |
|------|-------------|-------------|-----------|
| 1    | Gly-Side-O2 | Arg-Side-N1 | 99.98%    |
| 2    | Gly-Side-O3 | Arg-Side-N3 | 99.90%    |
| 3    | Gly-Side-O2 | Arg-Side-N3 | 99.88%    |
| 4    | Arg-Side-N1 | Gly-Side-O1 | 96.10%    |
| 5    | Arg-Side-N2 | Gly-Side-O1 | 88.43%    |
| 6    | Arg-Side-N4 | Gly-Side-O2 | 88.00%    |
| 7    | Arg-Side-N1 | Gly-Side-O2 | 86.23%    |
| 8    | Arg-Side-N3 | Gly-Side-O2 | 78.26%    |
| 9    | Gly-Side-O1 | Arg-Side-O1 | 68.96%    |
| 10   | Gly-Side-O2 | Arg-Side-C6 | 64.38%    |
| 11   | Arg-Side-O2 | Gly-Side-O2 | 64.28%    |
| 12   | Arg-Side-N4 | Gly-Side-O3 | 51.79%    |
| 13   | Gly-Side-O3 | Arg-Side-C6 | 47.29%    |
| 14   | Gly-Side-O1 | Arg-Side-N4 | 30.44%    |
| 15   | Arg-Side-N3 | Gly-Side-C3 | 23.62%    |
| 16   | Gly-Side-C3 | Arg-Side-O1 | 20.47%    |
| 17   | Ar-Side-O2  | Gly-Side-O3 | 18.00%    |
| 18   | Gly-Side-O1 | Arg-Side-O2 | 16.20%    |
| 19   | Gly-Side-O1 | Arg-Side-C3 | 14.72%    |
| 20   | Arg-Side-O2 | Gly-Side-C1 | 11.75%    |
| 21   | Arg-Side-N4 | Gly-Side-C3 | 11.47%    |
| 22   | Gly-Side-C3 | Arg-Side-O2 | 9.80%     |
| 23   | Arg-Side-N4 | Gly-Side-O1 | 9.60%     |
| 24   | Gly-Side-O3 | Arg-Side-O1 | 8.50%     |
| 25   | Gly-Side-C2 | Arg-Side-O1 | 6.32%     |
| 26   | Gly-Side-C1 | Arg-Side-O1 | 6.02%     |
| 27   | Gly-Side-O2 | Arg-Side-N2 | 5.60%     |
| 28   | Gly-Side-O2 | Arg-Side-C1 | 5.10%     |
| 29   | Gly-Side-O1 | Arg-Side-N3 | 4.87%     |
| 30   | Arg-Side-N4 | Gly-Side-C1 | 4.50%     |
| 31   | Arg-Side-C4 | Gly-Side-O2 | 4.20%     |
| 32   | Arg-Side-N1 | Gly-Side-C3 | 3.87%     |
| 33   | Arg-Side-O2 | Gly-Side-C3 | 3.02%     |
| 34   | Arg-Side-C5 | Gly-Side-O1 | 2.95%     |
| 35   | Arg-Side-C1 | Gly-Side-O2 | 2.92%     |
| 36   | Gly-Side-O1 | Arg-Side-C6 | 2.82%     |
| 37   | Arg-Side-C4 | Gly-Side-O3 | 2.42%     |
| 38   | Gly-Side-O3 | Arg-Side-C3 | 2.12%     |
| 39   | Arg-Side-C4 | Gly-Side-O1 | 1.92%     |
| 40   | Arg-Side-N1 | Gly-Side-O3 | 1.60%     |

|    |             |             |       |
|----|-------------|-------------|-------|
| 41 | Gly-Side-O2 | Arg-Side-N4 | 1.55% |
| 42 | Arg-Side-C5 | Gly-Side-O3 | 1.55% |
| 43 | Arg-Side-C2 | Gly-Side-O1 | 1.52% |
| 44 | Arg-Side-C5 | Gly-Side-O2 | 1.32% |
| 45 | Gly-Side-C1 | Arg-Side-N1 | 1.15% |
| 46 | Arg-Side-C2 | Gly-Side-O2 | 0.92% |
| 47 | Arg-Side-C2 | Gly-Side-O3 | 0.70% |
| 48 | Gly-Side-O3 | Arg-Side-N2 | 0.60% |
| 49 | Gly-Side-C3 | Arg-Side-N4 | 0.32% |
| 50 | Gly-Side-C1 | Arg-Side-O2 | 0.30% |
| 51 | Gly-Side-O3 | Arg-Side-N4 | 0.27% |
| 52 | Arg-Side-N2 | Gly-Side-O2 | 0.27% |
| 53 | Gly-Side-C1 | Arg-Side-N4 | 0.20% |
| 54 | Gly-Side-O3 | Arg-Side-O2 | 0.15% |
| 55 | Gly-Side-C3 | Arg-Side-C5 | 0.15% |
| 56 | Arg-Side-C1 | Gly-Side-C3 | 0.15% |
| 57 | Arg-Side-C5 | Gly-Side-C3 | 0.15% |
| 58 | Gly-Side-C3 | Arg-Side-N3 | 0.15% |
| 59 | Arg-Side-C1 | Gly-Side-O3 | 0.15% |
| 60 | Gly-Side-O1 | Arg-Side-C4 | 0.15% |
| 61 | Gly-Side-O2 | Arg-Side-O1 | 0.15% |
| 62 | Gly-Side-O1 | Arg-Side-N2 | 0.10% |
| 63 | Gly-Side-C3 | Arg-Side-N1 | 0.07% |
| 64 | Arg-Side-N4 | Gly-Side-C2 | 0.07% |
| 65 | Arg-Side-C2 | Gly-Side-C3 | 0.05% |
| 66 | Arg-Side-C5 | Gly-Side-C1 | 0.05% |
| 67 | Arg-Side-N2 | Gly-Side-C2 | 0.05% |
| 68 | Gly-Side-C1 | Arg-Side-C6 | 0.05% |
| 69 | Gly-Side-O1 | Arg-Side-C5 | 0.05% |
| 70 | Gly-Side-C2 | Arg-Side-O2 | 0.02% |
| 71 | Gly-Side-O1 | Arg-Side-N1 | 0.02% |
| 72 | Gly-Side-C3 | Arg-Side-N2 | 0.02% |
| 73 | Gly-Side-C2 | Arg-Side-N4 | 0.02% |
| 74 | Gly-Side-C2 | Arg-Side-N3 | 0.02% |
